# Supplementary material for: Poking COVID-19: Insights on Genomic Constraints among Immune-Related Genes between Qatari and Italian Populations
Source: MDPI journal article supplement (doi:10.3390/genes12111842), 2021-11-22

Inferred Ancestry: EUR

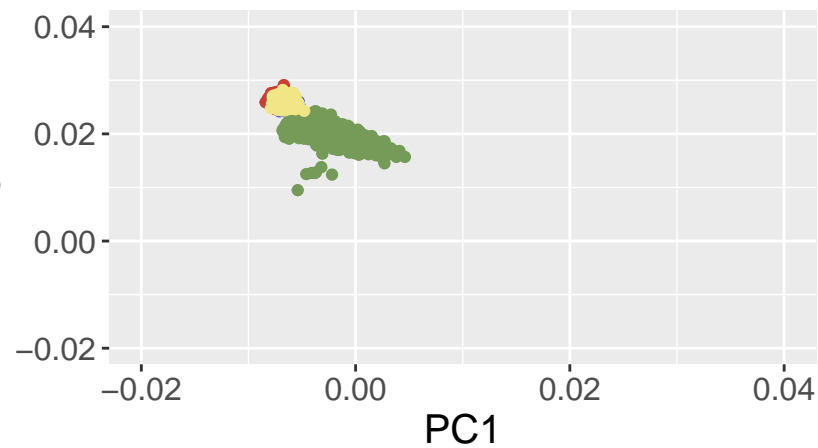

Inferred Ancestry: AFR

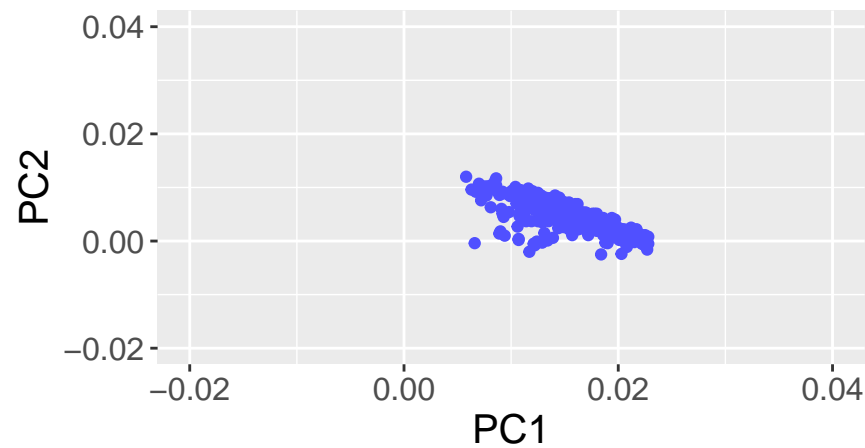

Inferred Ancestry: AMR

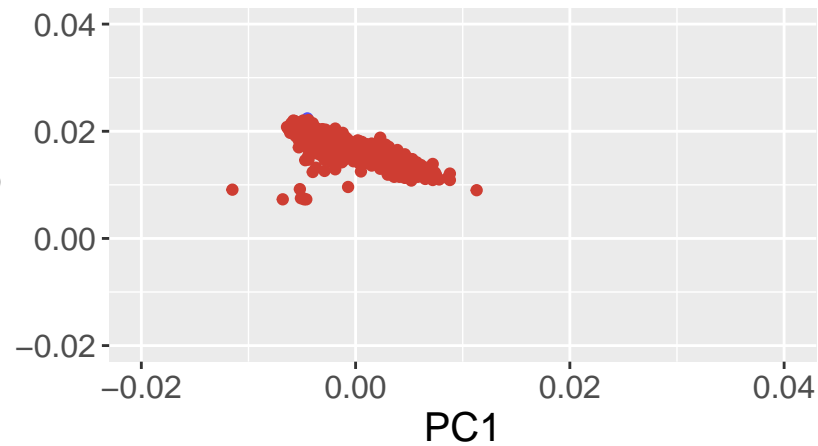

Inferred Ancestry: SAS

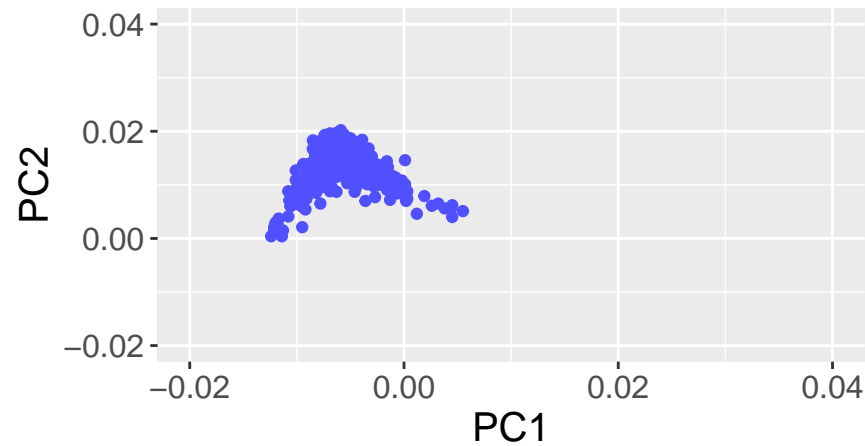

Inferred Ancestry: QGP

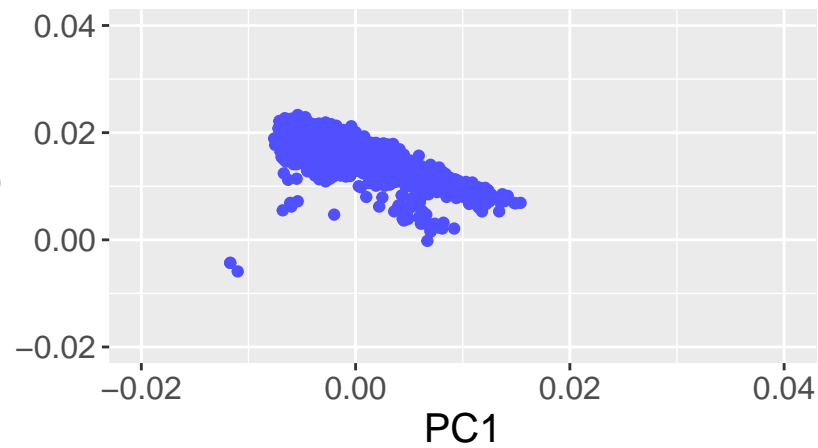

Supplement: s1 [file s1]
