# Supplementary material for: Poking COVID-19: Insights on Genomic Constraints among Immune-Related Genes between Qatari and Italian Populations
Source: MDPI journal article supplement (doi:10.3390/genes12111842), 2021-11-22
Supplement: s1 [file s1]

**Table S2:** List of genes recently associated with COVID-19 susceptibility and severity.

| <b>Gene</b>     | <b>Variants</b> | <b>Source</b>              | <b>Publication</b>                     |
|-----------------|-----------------|----------------------------|----------------------------------------|
| <i>SLC6A2</i>   | rs35081325      | HGI                        | not published in a peer review journal |
| <i>CXCR6</i>    |                 | HGI                        |                                        |
| <i>CCR1</i>     |                 | HGI                        |                                        |
| <i>OAS1</i>     | rs4766664       | HGI                        |                                        |
| <i>OAS2</i>     |                 | HGI                        |                                        |
| <i>OAS3</i>     |                 | HGI                        |                                        |
| <i>DPP9</i>     | rs2277732       | HGI                        |                                        |
| <i>TYK2</i>     | rs7956615       | HGI                        |                                        |
| <i>IFNAR2</i>   | rs13050728      | HGI                        |                                        |
| <i>IL10RB</i>   |                 | HGI                        |                                        |
| <i>IFNAR1</i>   |                 | HGI                        |                                        |
| <i>IFNAR2</i>   |                 | HGI                        |                                        |
| <i>FOXP4</i>    | rs1853837       | HGI                        |                                        |
| <i>TLR3</i>     |                 | Human Genetic Effort (HGE) | Zhnag et al, Science 2020              |
| <i>UNC93B1</i>  |                 | Human Genetic Effort (HGE) |                                        |
| <i>TICAM1</i>   |                 | Human Genetic Effort (HGE) |                                        |
| <i>TBK1</i>     |                 | Human Genetic Effort (HGE) |                                        |
| <i>IRF3</i>     |                 | Human Genetic Effort (HGE) |                                        |
| <i>IRF7</i>     |                 | Human Genetic Effort (HGE) |                                        |
| <i>LZTFL1</i>   |                 | Genomicc UK                | Castineira et al MedriXiv              |
| <i>CCHCR1</i>   |                 | Genomicc UK                |                                        |
| <i>HLA-DPB1</i> |                 | Genomicc UK                |                                        |
| <i>VSTM2A</i>   |                 | Genomicc UK                |                                        |
| <i>HAS2-AS1</i> |                 | Genomicc UK                |                                        |
| <i>IGF1</i>     |                 | Genomicc UK                |                                        |
| <i>ABO</i>      |                 |                            |                                        |

**Table S3:** Details of the comparisons defined between Target and Reference populations.

|                                                |           | <b>Target 1</b> | <b>Reference 1</b> |    | <b>Target 2</b> | <b>Reference 2</b> |
|------------------------------------------------|-----------|-----------------|--------------------|----|-----------------|--------------------|
| <b>Population specific</b>                     | <b>C1</b> | Relaxed (+)     | Costrained (-)     | vs | Costrained (-)  | Relaxed (+)        |
|                                                | <b>C2</b> | Costrained (-)  | Relaxed (+)        | vs | Relaxed (+)     | Costrained (-)     |
| <b>Population specific vs ancestry related</b> | <b>C3</b> | Relaxed (+)     | Costrained (-)     | vs | Costrained (-)  | Costrained (-)     |
|                                                | <b>C4</b> | Costrained (-)  | Relaxed (+)        | vs | Relaxed (+)     | Relaxed (+)        |
|                                                | <b>C5</b> | Costrained (-)  | Costrained (-)     | vs | Relaxed (+)     | Costrained (-)     |
|                                                | <b>C6</b> | Relaxed (+)     | Relaxed (+)        | vs | Costrained (-)  | Relaxed (+)        |
| <b>Ancestry related</b>                        | <b>C7</b> | Relaxed (+)     | Relaxed (+)        | vs | Costrained (-)  | Costrained (-)     |
|                                                | <b>C8</b> | Costrained (-)  | Costrained (-)     | vs | Relaxed (+)     | Relaxed (+)        |

**Table S 4:** Summary statistics of the phenotype information available for the TOV cohort.

|                                   |          | <b>Gender</b> |              | <b>Outcome</b>      |                     |                   |
|-----------------------------------|----------|---------------|--------------|---------------------|---------------------|-------------------|
| <b>Disease Severity group</b>     | <b>n</b> | <b>M (n)</b>  | <b>F (n)</b> | <b>Survived (n)</b> | <b>Deceased (n)</b> | <b>Age (mean)</b> |
| Asymptomatic/Paucisymptomatic (1) | 52       | 25            | 27           | 52                  | 0                   | 37.5              |
| Severe (2)                        | 73       | 45            | 28           | 60                  | 13                  | 60.4              |
| Critical/life-threatening (3)     | 64       | 40            | 24           | 21                  | 43                  | 68.4              |
| <b>total</b>                      | 189      | 110           | 79           | 133                 | 56                  | 57.73             |

**Table S5:** Comparison between scores distribution of target populations versus reference populations.

| <b>Reference</b> | <b>Target</b> | <b>P-value DSC</b> | <b>P-value SSC</b> |
|------------------|---------------|--------------------|--------------------|
| <b>EUR</b>       | <b>CAR</b>    | 1.33E-06           | 7.79E-07           |
| <b>EUR</b>       | <b>FVG</b>    | 3.17E-02           | 3.65E-08           |
| <b>EUR</b>       | <b>VBI</b>    | 3.78E-03           | 3.84E-07           |
| <b>AFR</b>       | <b>QGP</b>    | 4.64E-07           | 4.36E-01           |
| <b>SAS</b>       | <b>QGP</b>    | 2.97E-05           | 5.35E-01           |

**Table S6:** Enrichment tests in target populations versus reference populations.

| Reference | Target | DSC score          |                 | SSC score          |                 |
|-----------|--------|--------------------|-----------------|--------------------|-----------------|
|           |        | Costrained p-value | Relaxed p-value | Costrained p-value | Relaxed p-value |
| EUR       | CAR    | 2.08E-06           | 6.81E-04        | 1.38E-01           | 7.11E-04        |
| EUR       | FVG    | 2.27E-03           | 7.70E-02        | 3.19E-01           | 7.80E-06        |
| EUR       | VBI    | 2.27E-03           | 1.93E-03        | 2.82E-01           | 3.68E-06        |
| AFR       | QGP    | 3.72E-03           | 4.17E-01        | 1.00E+00           | 8.60E-01        |
| SAS       | QGP    | 3.51E-02           | 2.52E-01        | 7.51E-01           | 8.60E-01        |

**Table S7:** DSC and SSC scores for *FLNA*, *MUC5AC* and *ABCA7* in all 1000Genomes superpopulations.

| Gene Name     | Score | AFR     | AMR     | EAS     | EUR     | SAS     |
|---------------|-------|---------|---------|---------|---------|---------|
| <i>ABCA7</i>  | DSC   | 2.6813  | 1.6151  | 2.5922  | 3.0203  | 2.1504  |
|               | SSC   | 3.3248  | 4.0146  | 3.7889  | 2.5907  | 3.9976  |
| <i>FLNA</i>   | DSC   | -2.1657 | -2.0498 | -2.2511 | -2.3994 | -1.8791 |
|               | SSC   | -3.3509 | -3.3736 | -3.2086 | -3.0729 | -3.0966 |
| <i>MUC5AC</i> | DSC   | 3.4995  | 2.8133  | 2.8882  | 3.4774  | 3.0323  |
|               | SSC   | 3.2673  | 4.0639  | 4.1692  | 3.6789  | 4.2443  |

**Table S8:** Comparison of Gene Singleton Density between the Covid-19 positive cohort (TOV) and other target and reference populations. All singleton counts have been adjusted considering the sample size of each cohort.

| Transcript ID   | Gene name    | Cohort | P-value    | OR      | TOV Gene singleton count | TOV Gene singleton density | Cohort Gene singleton count | Cohort Gene singleton density |
|-----------------|--------------|--------|------------|---------|--------------------------|----------------------------|-----------------------------|-------------------------------|
| ENST00000369850 | <i>FLNA</i>  | CAR    | 0.630140   | 1.4201  | 13                       | 0.00050                    | 6                           | 0.00023                       |
|                 |              | FVG    | 0.046901   | 2.3537  | 13                       | 0.00050                    | 11                          | 0.00042                       |
|                 |              | VBI    | 0.000458   | 5.8145  | 13                       | 0.00050                    | 5                           | 0.00019                       |
|                 |              | QGP    | 0.000028   | 4.3237  | 13                       | 0.00050                    | 229                         | 0.00877                       |
|                 |              | EUR    | 0.312323   | 0.6893  | 13                       | 0.00050                    | 61                          | 0.00234                       |
|                 |              | AFR    | 0.878006   | 0.9218  | 13                       | 0.00050                    | 60                          | 0.00230                       |
|                 |              | SAS    | 0.200408   | 0.6464  | 13                       | 0.00050                    | 61                          | 0.00234                       |
| ENST00000263094 | <i>ABCA7</i> | CAR    | 3.2746E-11 | 10.9752 | 84                       | 0.00328                    | 5                           | 0.00020                       |
|                 |              | FVG    | 3.1278E-23 | 12.8380 | 84                       | 0.00328                    | 13                          | 0.00051                       |
|                 |              | VBI    | 7.1607E-21 | 8.5370  | 84                       | 0.00328                    | 22                          | 0.00086                       |
|                 |              | QGP    | 6.2413E-63 | 17.8135 | 84                       | 0.00328                    | 359                         | 0.01404                       |
|                 |              | EUR    | 4.4467E-10 | 2.9802  | 84                       | 0.00328                    | 91                          | 0.00356                       |
|                 |              | AFR    | 1.7360E-08 | 2.5141  | 84                       | 0.00328                    | 142                         | 0.00555                       |

|                        |            |            |         |     |         |     |         |
|------------------------|------------|------------|---------|-----|---------|-----|---------|
|                        | <b>SAS</b> | 2.3435E-04 | 1.8442  | 84  | 0.00328 | 138 | 0.00540 |
| <b>ENST00000621226</b> | <b>CAR</b> | 7.4274E-12 | 7.4508  | 114 | 0.00264 | 10  | 0.00023 |
|                        | <b>FVG</b> | 1.8836E-31 | 15.0962 | 114 | 0.00264 | 15  | 0.00035 |
|                        | <b>VBI</b> | 2.3148E-36 | 19.6004 | 114 | 0.00264 | 13  | 0.00030 |
|                        | <b>QGP</b> | 1.5512E-76 | 15.4443 | 114 | 0.00264 | 562 | 0.01301 |
|                        | <b>EUR</b> | 3.3142E-06 | 1.9908  | 114 | 0.00264 | 185 | 0.00428 |
|                        | <b>AFR</b> | 2.9701E-08 | 2.2129  | 114 | 0.00264 | 219 | 0.00507 |
|                        | <b>SAS</b> | 7.2316E-03 | 1.4702  | 114 | 0.00264 | 235 | 0.00544 |

**Table S9:** Comparison of Coding Singleton Density between the Covid-19 positive cohort (TOV) and other target and reference populations. All singleton counts have been adjusted considering the sample size of each cohort.

| Transcript ID          | Gene name     | Cohort     | P-value    | OR      | TOV CDS<br>singleton<br>count | TOV CDS<br>singleton<br>density | Cohort<br>CDS<br>singleton<br>count | Cohort<br>CDS<br>singleton<br>density |
|------------------------|---------------|------------|------------|---------|-------------------------------|---------------------------------|-------------------------------------|---------------------------------------|
|                        |               | <b>CAR</b> | 0.409653   | 3.2705  | 5                             | 0.00063                         | 1                                   | 0.00013                               |
|                        |               | <b>FVG</b> | 0.316565   | 1.9922  | 5                             | 0.00063                         | 5                                   | 0.00063                               |
|                        |               | <b>VBI</b> | 0.013015   | 11.1693 | 5                             | 0.00063                         | 1                                   | 0.00013                               |
| <b>ENST00000369850</b> | <b>FLNA</b>   | <b>QGP</b> | 0.039803   | 2.7799  | 5                             | 0.00063                         | 137                                 | 0.01725                               |
|                        |               | <b>EUR</b> | 0.786342   | 1.1543  | 5                             | 0.00063                         | 14                                  | 0.00176                               |
|                        |               | <b>AFR</b> | 0.787767   | 1.1814  | 5                             | 0.00063                         | 18                                  | 0.00227                               |
|                        |               | <b>SAS</b> | 0.813561   | 0.7582  | 5                             | 0.00063                         | 20                                  | 0.00252                               |
|                        |               | <b>CAR</b> | 2.5959E-07 | 14.3697 | 44                            | 0.00683                         | 2                                   | 0.00031                               |
|                        |               | <b>FVG</b> | 1.0535E-17 | 43.6709 | 44                            | 0.00683                         | 2                                   | 0.00031                               |
|                        |               | <b>VBI</b> | 2.0060E-16 | 19.6584 | 44                            | 0.00683                         | 5                                   | 0.00078                               |
| <b>ENST00000263094</b> | <b>ABCA7</b>  | <b>QGP</b> | 1.5606E-40 | 24.9877 | 44                            | 0.00683                         | 134                                 | 0.02080                               |
|                        |               | <b>EUR</b> | 1.0966E-08 | 4.0565  | 44                            | 0.00683                         | 35                                  | 0.00543                               |
|                        |               | <b>AFR</b> | 5.3713E-09 | 3.8931  | 44                            | 0.00683                         | 48                                  | 0.00745                               |
|                        |               | <b>SAS</b> | 3.7924E-06 | 2.9601  | 44                            | 0.00683                         | 45                                  | 0.00699                               |
|                        |               | <b>CAR</b> | 8.4692E-11 | 12.4070 | 76                            | 0.00448                         | 4                                   | 0.00024                               |
|                        |               | <b>FVG</b> | 2.7623E-24 | 18.8715 | 76                            | 0.00448                         | 8                                   | 0.00047                               |
|                        |               | <b>VBI</b> | 3.2118E-30 | 42.4223 | 76                            | 0.00448                         | 4                                   | 0.00024                               |
| <b>ENST00000621226</b> | <b>MUC5AC</b> | <b>QGP</b> | 1.2101E-64 | 23.1499 | 76                            | 0.00448                         | 250                                 | 0.01474                               |
|                        |               | <b>EUR</b> | 4.0071E-08 | 2.6675  | 76                            | 0.00448                         | 92                                  | 0.00542                               |
|                        |               | <b>AFR</b> | 1.0241E-10 | 3.1351  | 76                            | 0.00448                         | 103                                 | 0.00607                               |
|                        |               | <b>SAS</b> | 9.9471E-05 | 1.9678  | 76                            | 0.00448                         | 117                                 | 0.00690                               |

**Table S10:** Multinomial analysis results, comparing classes of disease severity, considering the burden of singletons in the whole gene. Class 1: Asymptomatic/Paucisymptomatic; Class 2: Severe; Class 3: Critical/life-threatening. Only significant predictors are reported.

| IC 95%             |               |          |            |          |           |             |             |                 |
|--------------------|---------------|----------|------------|----------|-----------|-------------|-------------|-----------------|
| Severity Class     | Predictor     | Estimate | Std. Error | P-value  | OR        | Lower bound | Upper bound | Std. Error (OR) |
| Class 2 vs Class 1 | Age           | 6.72E-02 | 1.36E-02   | 8.35E-07 | 1.0695029 | 1.0412933   | 1.0984768   | 0.0145859       |
|                    | Gender (Male) | 9.25E-01 | 4.63E-01   | 0.05     | 2.5208194 | 1.0173269   | 6.2463014   | 1.1670436       |
| Class 3 vs Class 1 | Age           | 1.01E-01 | 1.63E-02   | 4.92E-10 | 1.1064869 | 1.0717711   | 1.1423270   | 0.0179959       |
|                    | Gender (Male) | 1.10E+00 | 5.09E-01   | 0.03     | 2.9987634 | 1.1061065   | 8.1299424   | 1.5259327       |
| Class 3 vs Class 2 | Age           | 3.40E-02 | 1.17E-02   | 0        | 1.0345794 | 1.0111462   | 1.0585557   | 0.0120932       |

**Table S11:** Multinomial analysis results, comparing classes of disease severity, considering the burden of singletons in the coding regions of each gene. Class 1: Asymptomatic/Paucisymptomatic; Class 2: Severe; Class 3: Critical/life-threatening. Only significant predictors are reported.

| IC 95%             |               |           |            |           |              |              |              |                 |
|--------------------|---------------|-----------|------------|-----------|--------------|--------------|--------------|-----------------|
| Severity Class     | Predictor     | Estimate  | Std. Error | P-value   | OR           | Lower bound  | Upper bound  | Std. Error (OR) |
| Class 2 vs Class 1 | Age           | 6.87E-02  | 1.38E-02   | 6.09E-07  | 1.0711545    | 1.0426111    | 1.1004793    | 0.0147605       |
|                    | Gender (Male) | 9.39E-01  | 4.68E-01   | 0.04      | 2.5573716    | 1.0227587    | 6.3946161    | 1.1958014       |
|                    | FLNA          | -1.04E+01 | 7.39E-05   | < 2.2e-16 | 0.0000296    | 0.0000296    | 0.0000296    | 0.0000000022    |
| Class 3 vs Class 1 | Age           | 9.86E-02  | 1.60E-02   | 6.42E-10  | 1.1036457    | 1.0696605    | 1.1387107    | 0.0176120       |
|                    | Gender (Male) | 1.18E+00  | 5.08E-01   | 0.02      | 3.2520969    | 1.2007352    | 8.8080493    | 1.6532035       |
| Class 3 vs Class 2 | Age           | 2.99E-02  | 1.14E-02   | 0.01      | 1.0303340    | 1.0076149    | 1.0535653    | 0.0117211       |
|                    | FLNA          | 7.98E+00  | 5.18E-01   | < 2.2e-16 | 2933.6216596 | 1063.3832398 | 8093.1650220 | 1518.8708798    |

**Table S12:** Logistic analysis results for disease outcome classification. Only significant predictors are reported.

| IC 95%              |           |          |            |          |           |             |             |                 |
|---------------------|-----------|----------|------------|----------|-----------|-------------|-------------|-----------------|
| Outcome             | Predictor | Estimate | Std. Error | P-value  | OR        | Lower bound | Upper bound | Std. Error (OR) |
| Survied vs Deceased | Age       | 1.07E-01 | 1.67E-02   | 1.50E-10 | 1.1129343 | 1.0770954   | 1.1499656   | 0.0185860       |
|                     | ABCA7     | 4.20E-01 | 1.85E-01   | 0.0228   | 1.5225705 | 1.0603341   | 2.1863118   | 0.2810665       |

**Table S13:** Logistic analysis results for disease outcome classification considering the burden of singletons in the coding regions of each gene. Only significant predictors are reported.

| IC 95%              |           |          |            |          |           |             |             |                 |
|---------------------|-----------|----------|------------|----------|-----------|-------------|-------------|-----------------|
| Outcome             | Predictor | Estimate | Std. Error | P-value  | OR        | Lower bound | Upper bound | Std. Error (OR) |
| Survied vs Deceased | Age       | 1.05E-01 | 1.66E-02   | 2.33E-10 | 1.1110439 | 1.0754556   | 1.1478098   | 0.0184544       |
